# Supplementary material for: Ti3C2Tx quantum dots/polyvinyl alcohol films as an enhanced long-term stable saturable absorber device for ultrafast photonics
Source: Royal Society of Chemistry journal article supplement (doi:10.1039/d2tc03680k), 2022-01-01
Supplement: d2tc03680k1.pdf [file d2tc03680k1.pdf]

**Supporting Information**  
**for**  
**Ti<sub>3</sub>C<sub>2</sub>T<sub>x</sub> Quantum Dots/ Polyvinyl alcohol Films as**  
**Enhanced Long-term Stable Saturable Absorber**  
**Device for Ultrafast Photonics**

Jianfeng Liu<sup>1</sup>, Shanshan Chen<sup>1,2\*</sup>, Lili Tao<sup>1,2</sup>, Yu Zhao<sup>1,2</sup>, Junshan He<sup>1</sup>, Le Huang<sup>1,2</sup>,  
Yibin Yang<sup>1,2</sup>

<sup>1</sup>*School of Materials and Energy, Guangdong University of Technology, Guangzhou, 510006, China*

<sup>2</sup>*Guangdong Provincial Key Laboratory of Information Photonics Technology, Guangdong University of Technology, Guangzhou, 510006, China*

\*Corresponding author: [chensunny@gdut.edu.cn](mailto:chensunny@gdut.edu.cn)

## Preparation of $\text{Ti}_3\text{C}_2\text{T}_x$ QDs and its PVA SA Device

Firstly, the mixture of 3.2 g lithium fluoride (99.99 %, Macklin) and 40 mL 9 M hydrochloric acid (36 wt%, Guangzhou) was served as the etchant to obtain  $\text{Ti}_3\text{C}_2\text{T}_x$  NSs. Magnetic stirrer was exploited to ensure the mixture complete dissolution in a 100 ml polytetrafluoroethylene beaker. Then, 2.0 g  $\text{Ti}_3\text{AlC}_2$  (400 mesh, 11 Technology Co., Ltd., China) was slowly added to the solvent. The etching procedure was stirred at 350 rpm for 24 h at 35°C. Next, 1 M HCl was used to remove excess LiF and coproduct  $\text{AlF}_3$  by centrifugation (H1850, Cence, China) for 2-3 times after reaction. Subsequent wash with deionized water for several times to make the pH of the supernatant reach 6, and then the multilayer  $\text{Ti}_3\text{C}_2\text{T}_x$  was obtained. Better delamination was carried by an ice bath ultrasonication (KQ-500VDE, ShuMei) for 2 hours until the sediment swelling. The mono or few-layer  $\text{Ti}_3\text{C}_2\text{T}_x$  in dark green supernatant was collected by repeatedly centrifuging at 3500 rpm for 1 h. the dehydration process was conducted in a freezing dryer (LC-12N-50A, LiChen) to keep the mono or few-layer  $\text{Ti}_3\text{C}_2\text{T}_x$  from oxidization. A portion of the fully dried mono or few-layer  $\text{Ti}_3\text{C}_2\text{T}_x$  was used for characterization, and the remaining portion was used to prepare quantum dots by probe sonication (Scientz-II, SCIENTZ, Ningbo Scientz Biotechnology Co., Ltd.) in ethanol (99.7%, Sun, Tianjin Zhiyuan Reagent Co., Ltd) for 12 hours. Finally,  $\text{Ti}_3\text{C}_2\text{T}_x$  QDs was collected by centrifugation for twice at 10000 rpm for 1 h and distilled to 10 ml.

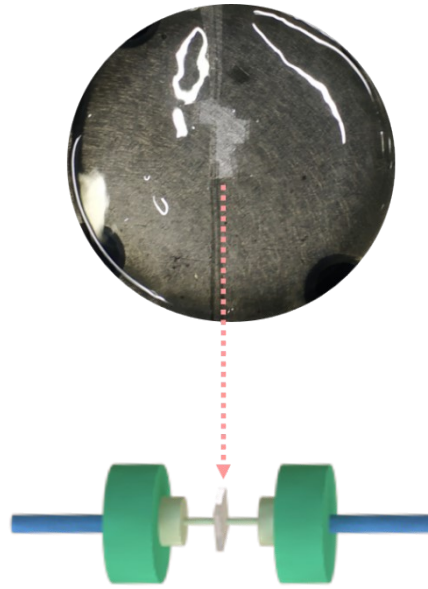

**Figure S1** Schematic diagram of  $\text{Ti}_3\text{C}_2\text{T}_x$  QDs/PVA SA device.

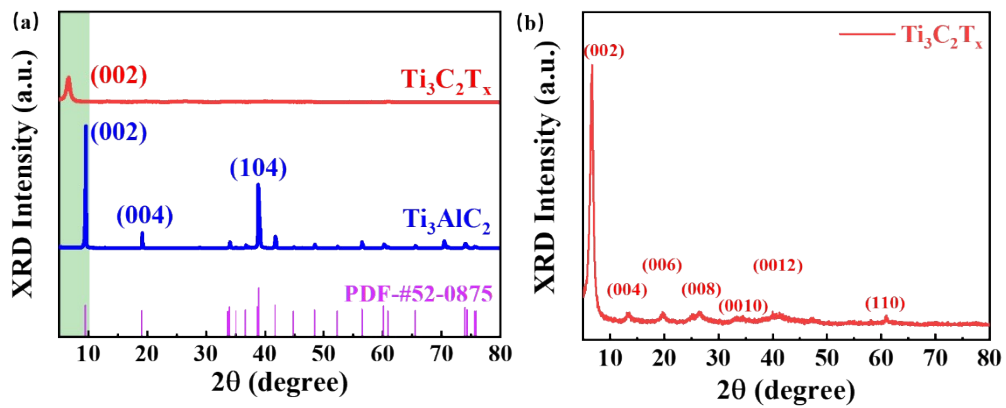

**Figure S2** (a) XRD patterns of  $\text{Ti}_3\text{AlC}_2$  MAX,  $\text{Ti}_3\text{C}_2\text{T}_x$  NSs. (b) XRD pattern of  $\text{Ti}_3\text{C}_2\text{T}_x$  NSs.

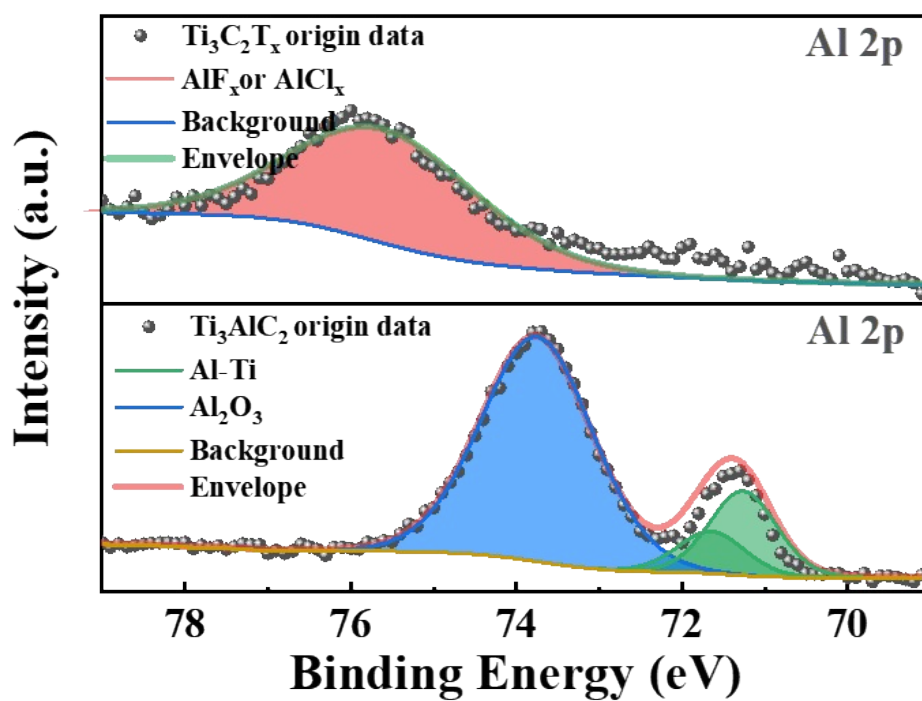

Figure S3 Component peak-fitting of XPS spectra for Al

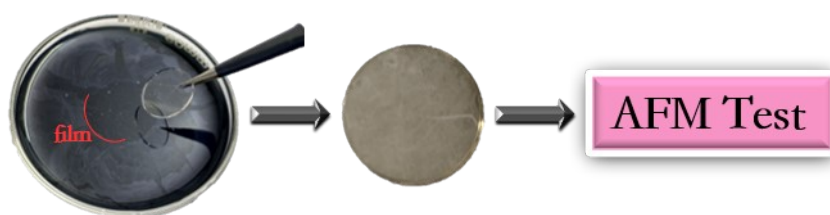

Figure S4 Schematic diagram of SPM test method.

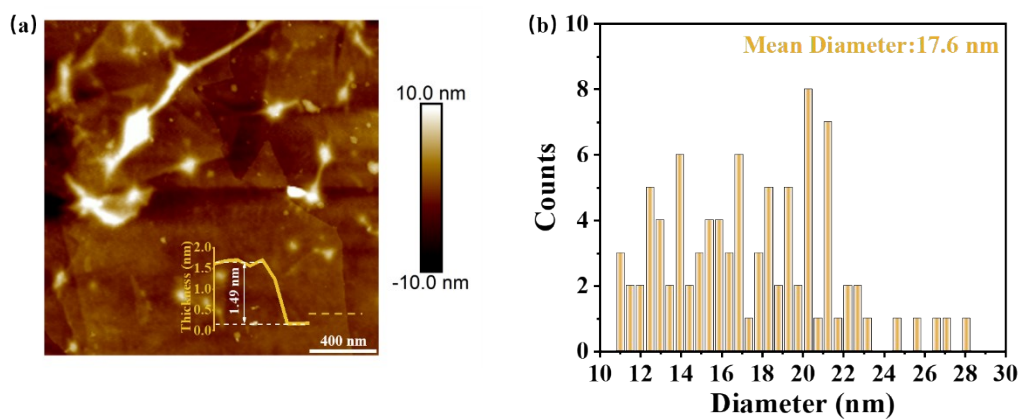

Figure S5 (a) SPM image of  $\text{Ti}_3\text{C}_2\text{T}_x$  NSs. (b) Diameter histogram of  $\text{Ti}_3\text{C}_2\text{T}_x$  QDs.

## Ultrafast Laser Application

The ring cavity was pumped by a 980 nm single-mode diode laser (Connet, VLSS-980) with a 980/1550 nm wavelength division multiplexer (WDM). A 1.2 m  $\text{Er}^{3+}$  doped fiber (EDF, LIEKKI, Er30) was used as the gain medium. The polarization independent isolator (PI-ISO) was employed to ensure the unidirectional operation of the laser in the ring cavity. Cavity polarization state and intracavity birefringence were adjusted by a polarization controller (PC). The PVA SA based on  $\text{Ti}_3\text{C}_2\text{T}_x$  QDs was incorporated between WDM and PC through FC (Ferrule Contactor)/APC (Angled Physical Contact) connectors. 10% of the laser separated by the OC (9:1) was used for detection, and the remaining 90% returned ring cavity to continue resonance. In addition, a certain length of single-mode fiber (SMF) was needed to the ring cavity for signal output. The output laser characteristics were monitored by an oscilloscope (Tektronix, MDO4104B) equipped with an ultrafast photodetector (EOT, ET-5000). The output laser spectrum was detected by an optical analyzer (Avesta.ASP-IR-2.6). The width of mode-locked pulse was detected by an autocorrelator (Femtochrome, FR-103XL).

The group velocity dispersion (GVD) of EDF and SMF were  $21.7 \text{ ps}^2/\text{km}$  and  $-27.6 \text{ ps}^2/\text{km}$  at 1550 nm, respectively. In the mode-locked case, the cavity length was 22.6 m. Therefore, when the dispersion of PVA SA or other influence factors was not considered, the net dispersion could be calculated to be  $-0.565 \text{ ps}^2$  for mode-locked laser. It means the EDFL operated in an anomalous region.

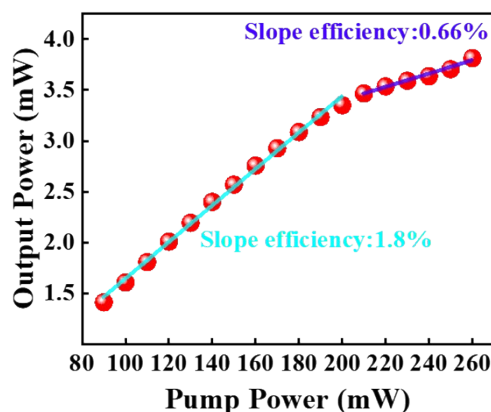

**Figure S6** Output power varies with pump power. (Q-switched)

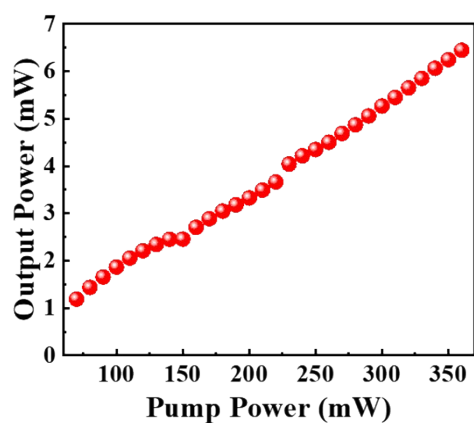

Figure S7 Output power varies with pump power. (Mode-locked)

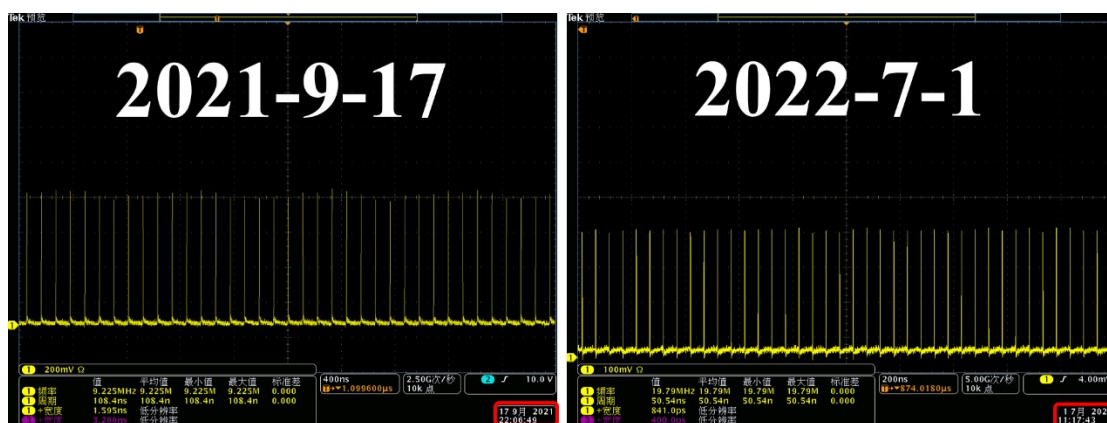

Figure S8 Oscilloscope screenshots of the mode-locking operation based on  $Ti_3C_2T_x$  QDs at different times.

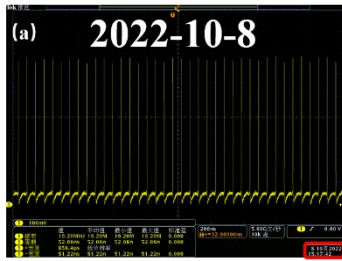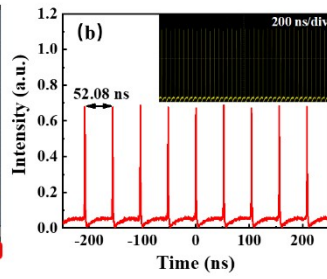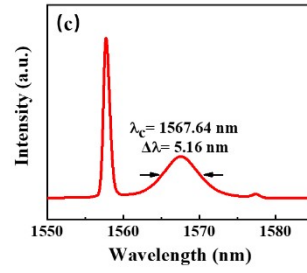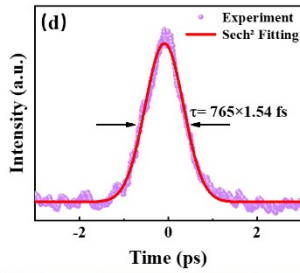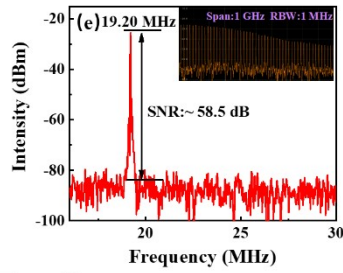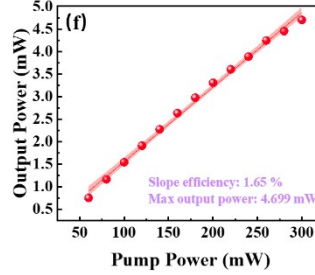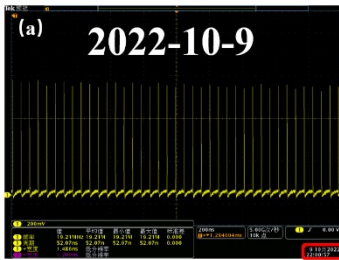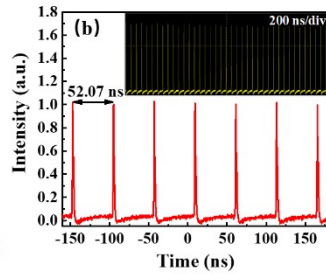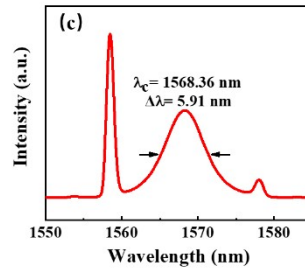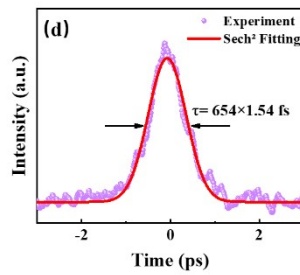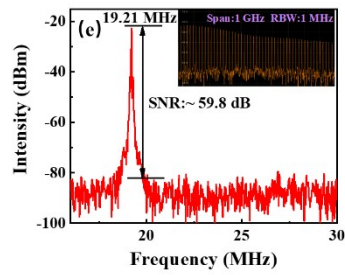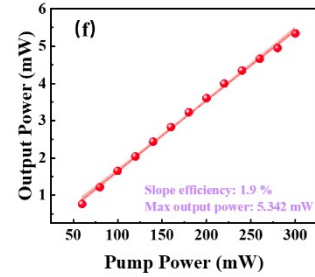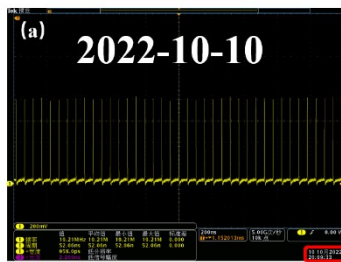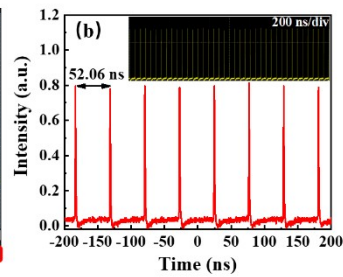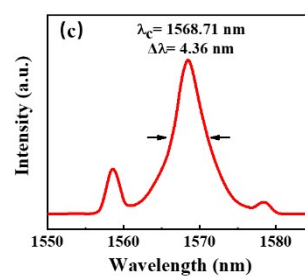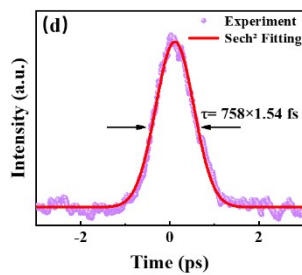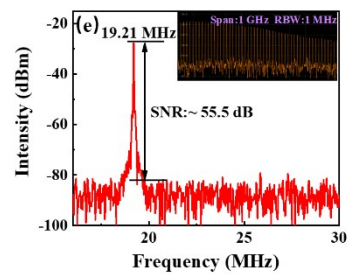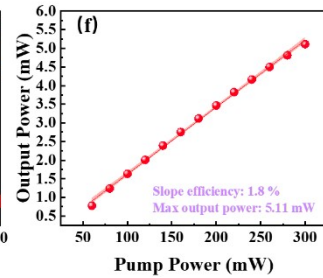

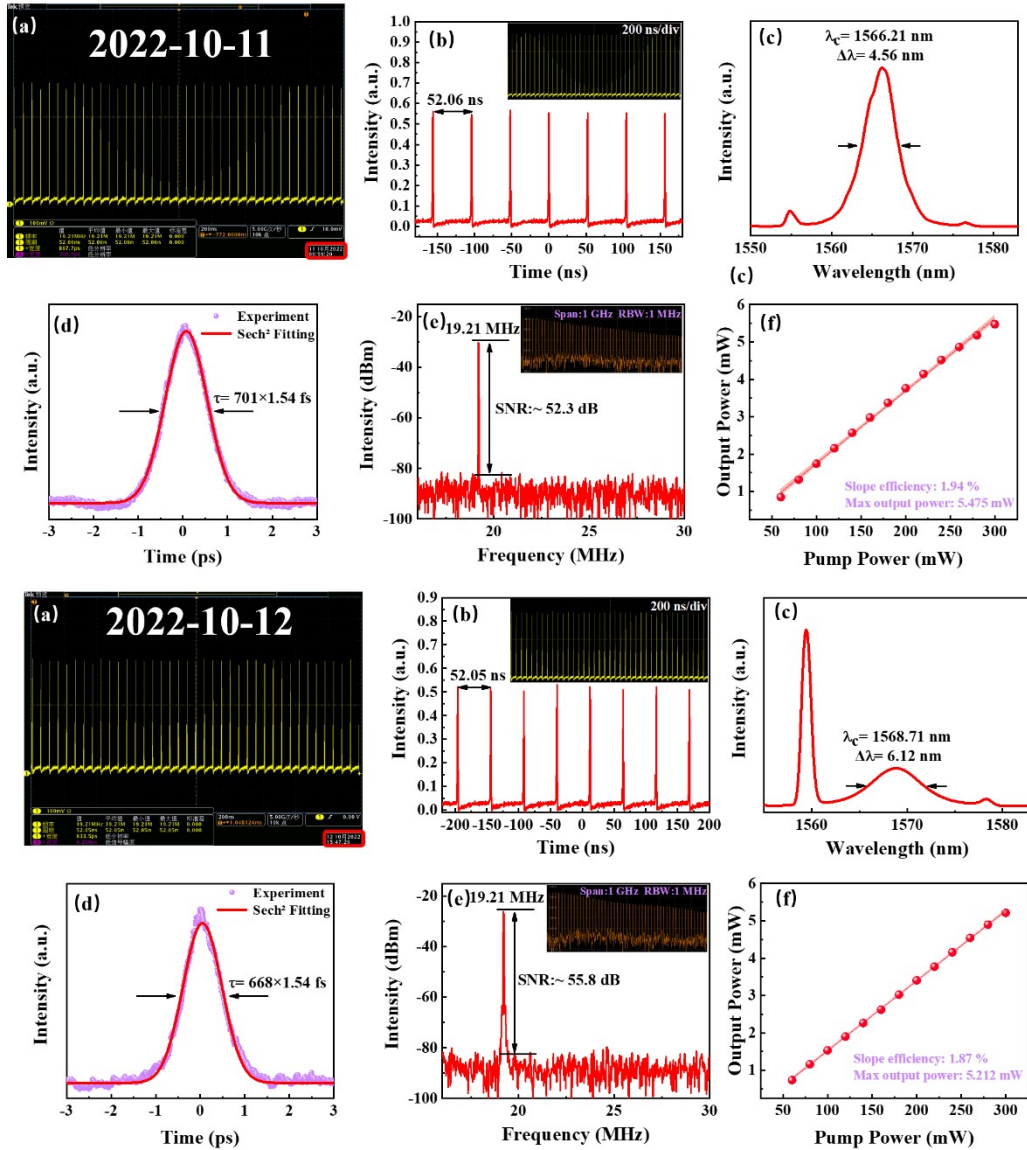

**Figure S9** (a) Oscilloscope screenshots (various days). (b) Pulse sequences. (c) Mode-locking optical spectrum. (d) Autocorrelation trace with a sech<sup>2</sup> fitting. (e) The RF spectrum at the fundamental frequency; inset: the broadband RF spectrum withing 1 GHz with a RBW of 1 MHz. (f) Output power varies with pump power.



**Table S1 XPS peak fitting results for as-prepared Ti<sub>3</sub>C<sub>2</sub>T<sub>x</sub>.**

| Region                                    | BE (eV)      | FWHM (eV) | Fraction (%) | Assigned to                           |
|-------------------------------------------|--------------|-----------|--------------|---------------------------------------|
| Ti 2p <sub>3/2</sub> (2p <sub>1/2</sub> ) | 454.7(460.6) | 1.2(2.0)  | 45           | C-Ti-C                                |
|                                           | 455.7(461.5) | 1.5(2.0)  | 27           | C-Ti-O                                |
|                                           | 456.9(462.8) | 2.0(1.3)  | 21           | C-Ti-F/Cl                             |
|                                           | 458.6(464.2) | 1.5(1.6)  | 7            | TiO <sub>2</sub>                      |
| C 1s                                      | 281.7        | 0.8       | 46           | C-Ti-C                                |
|                                           | 282.6        | 0.7       | 6            | C-Ti-T <sub>x</sub>                   |
|                                           | 284.8        | 3.2       | 48           | C-C                                   |
| O 1s                                      | 529.8        | 1.3       | 30           | TiO <sub>2</sub>                      |
|                                           | 531.0        | 1.5       | 40           | C-Ti-O <sub>x</sub>                   |
|                                           | 532.2        | 1.5       | 19           | C-Ti-(OH) <sub>x</sub>                |
|                                           | 533.4        | 1.5       | 9            | H <sub>2</sub> O                      |
|                                           | 535.0        | 1.5       | 2            | Al(OH) <sub>x</sub>                   |
| F 1s                                      | 684.3        | 1.6       | 47           | C-Ti-F                                |
|                                           | 686.0        | 2.5       | 53           | Metal fluoride (AlF <sub>x</sub> )    |
| Al 2p                                     | 75.6         | 2.73      | 100          | AlF <sub>x</sub> or AlCl <sub>x</sub> |
| Cl 2p                                     | 199.1(200.8) | 1.2(1.2)  | 78           | C-Ti-Cl                               |
|                                           | 200.1(201.8) | 1.5(1.5)  | 22           | Metal chloride (AlCl <sub>x</sub> )   |

**Table S2 XPS peak fitting results for Ti<sub>3</sub>AlC<sub>2</sub>(MAX).**

| Region                                    | BE (eV)      | FWHM (eV) | Fraction (%) | Assigned to                    |
|-------------------------------------------|--------------|-----------|--------------|--------------------------------|
| Ti 2p <sub>3/2</sub> (2p <sub>1/2</sub> ) | 453.9(460.0) | 1.2(1.3)  | 25           | C-Ti-C                         |
|                                           | 455.4(461.3) | 2.5(3.0)  | 33           | C-Ti-Al                        |
|                                           | 458.2(463.9) | 1.5(1.9)  | 42           | TiO <sub>2</sub>               |
| C 1s                                      | 281.0        | 0.8       | 7            | C-Ti                           |
|                                           | 284.8        | 1.5       | 74           | C-C                            |
|                                           | 286.4        | 1.5       | 12           | C-O                            |
|                                           | 288.8        | 1.3       | 7            | C=O                            |
| O 1s                                      | 529.7        | 1.5       | 39           | TiO <sub>2</sub>               |
|                                           | 531.6        | 2.4       | 53           | C-Ti-O <sub>x</sub>            |
|                                           | 533.6        | 1.5       | 8            | H <sub>2</sub> O               |
| Al 2p <sub>3/2</sub> (2p <sub>1/2</sub> ) | 71.3(71.7)   | 0.7(0.7)  | 19           | Al-Ti                          |
|                                           | 73.8         | 1.7       | 81           | Al <sub>2</sub> O <sub>3</sub> |

**Table S3** Summary of performance for five consecutive days.

| <b>Time</b> | <b>Central wavelength<br/>/ Bandwidth (nm)</b> | <b>Repetition<br/>Rate (MHz)</b> | <b>Pulse duration (fs)</b> | <b>SNR (dBm)</b> |
|-------------|------------------------------------------------|----------------------------------|----------------------------|------------------|
| 2022-10-8   | 1567.64/5.16                                   | 19.20                            | 765                        | 58.5             |
| 2022-10-9   | 1568.36/5.91                                   | 19.21                            | 654                        | 59.8             |
| 2022-10-10  | 1568.71/4.36                                   | 19.21                            | 758                        | 55.5             |
| 2022-10-11  | 1566.21/4.56                                   | 19.21                            | 701                        | 52.3             |
| 2022-10-12  | 1568.71/6.12                                   | 19.21                            | 668                        | 55.8             |
